# Supplementary material for: Multifractal behaviour of the soil water content of a vineyard in northwest Spain during two growing seasons
Source: Copernicus journal article supplement (doi:10.5194/npg-23-205-2016), 2016-08-02

Supplement of Nonlin. Processes Geophys., 23, 205–213, 2016  
<http://www.nonlin-processes-geophys.net/23/205/2016/>  
doi:10.5194/npg-23-205-2016-supplement  
© Author(s) 2016. CC Attribution 3.0 License.

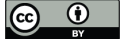

Nonlinear Processes  
in Geophysics

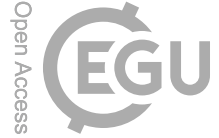

*Supplement of*

## **Multifractal behaviour of the soil water content of a vineyard in northwest Spain during two growing seasons**

**José Manuel Mirás-Avalos et al.**

*Correspondence to:* José Manuel Mirás-Avalos ([jose.manuel.miras.avalos@xunta.es](mailto:jose.manuel.miras.avalos@xunta.es))

The copyright of individual parts of the supplement might differ from the CC-BY 3.0 licence.

**Multifractal behaviour of the soil water content of a vineyard in NW Spain during two growing seasons. Mirás-Avalos et al. (Supplementary Materials)**

**Supplementary information**

**Table S1.** Summary of climate variables (temperature, rainfall,  $ET_0$  and  $ET_c$ ), irrigation water applied and harvest date for the studied and irrigation periods in 2011 and 2012.

|                    |         | 2011                       | 2012                       |
|--------------------|---------|----------------------------|----------------------------|
| Measurement period |         | 14 June to 26 August       | 14 June to 26 August       |
| Temperature (°C)   | Maximum | 28.86                      | 28.21                      |
|                    | Minimum | 12.44                      | 12.33                      |
|                    | Mean    | 20.15                      | 19.67                      |
| Rainfall (mm)      |         | 25.60                      | 65.60                      |
| $ET_0$             |         | 230.78                     | 344.91                     |
| $ET_c$             |         | 184.63                     | 275.93                     |
| Irrigation period  |         | 9 July to 16 August        | 20 July to 22 August       |
| Temperature (°C)   | Maximum | 29.14                      | 30.37                      |
|                    | Minimum | 12.61                      | 12.77                      |
|                    | Mean    | 20.36                      | 20.82                      |
| Rainfall (mm)      |         | 10.20                      | 29.20                      |
| $ET_0$             |         | 117.86                     | 162.52                     |
| $ET_c$             |         | 94.28                      | 130.02                     |
| Irrigation (mm)    |         | 39.67                      | 50.00                      |
| Harvest date       |         | 14 <sup>th</sup> September | 13 <sup>th</sup> September |

**Figure S1.** Selected plots of the natural logarithms of the partition function,  $\chi(q, \delta)$ , versus the time resolution,  $\delta$ : a) rain-fed treatment at 20 cm depth in 2011; b) irrigated treatment at 20 cm depth in 2011.

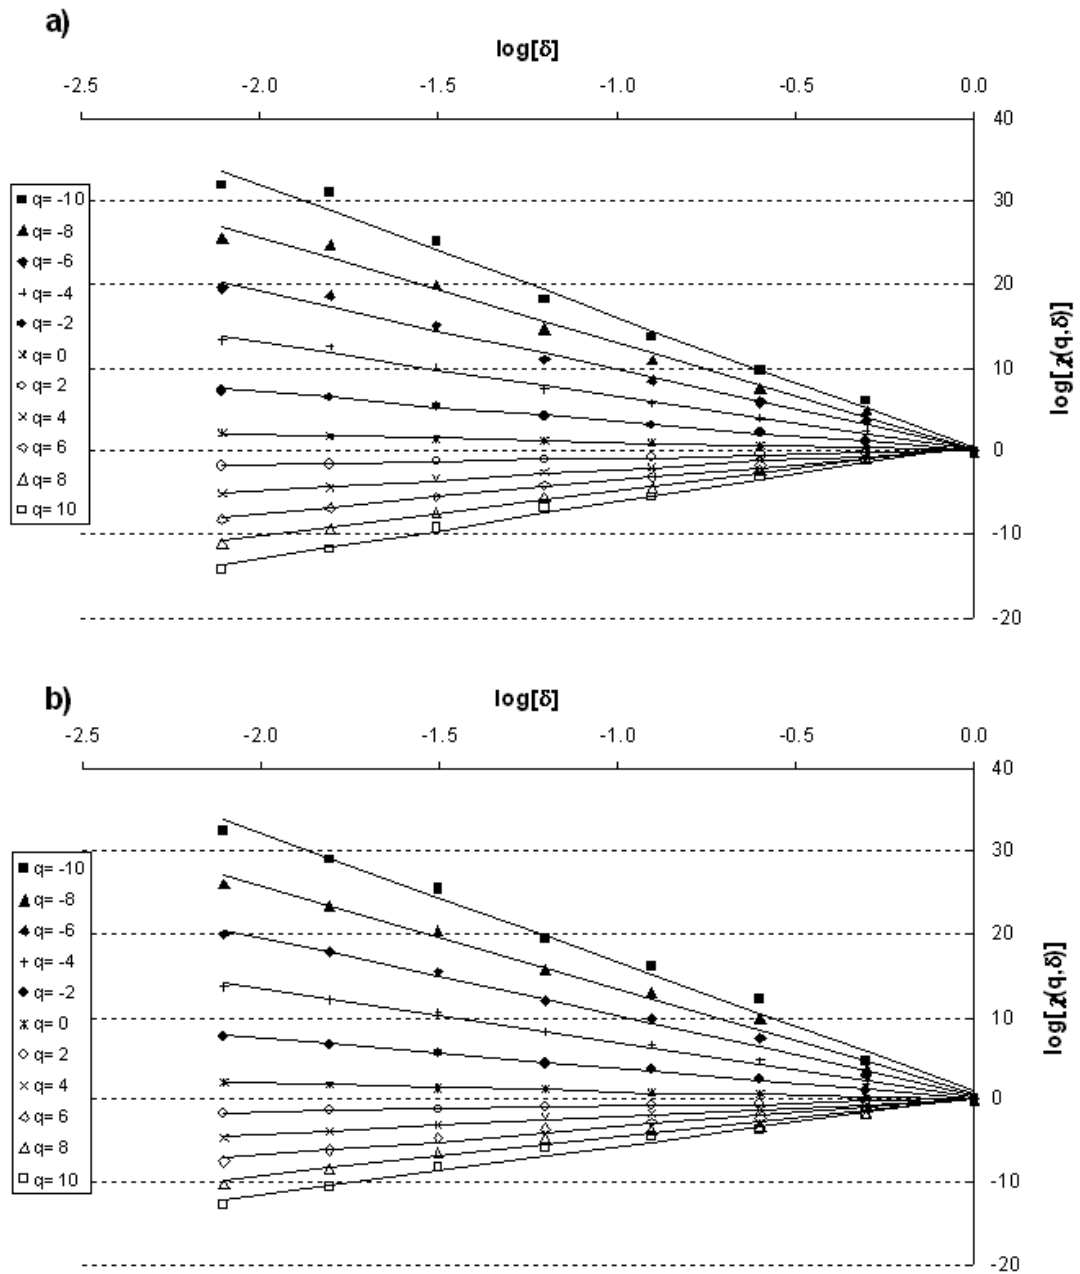

**Figure S2.** Mass exponents,  $\tau(q)$ , of soil water content averaged from 20 to 60 cm depth for rain-fed and irrigation treatments in 2011 and 2012.

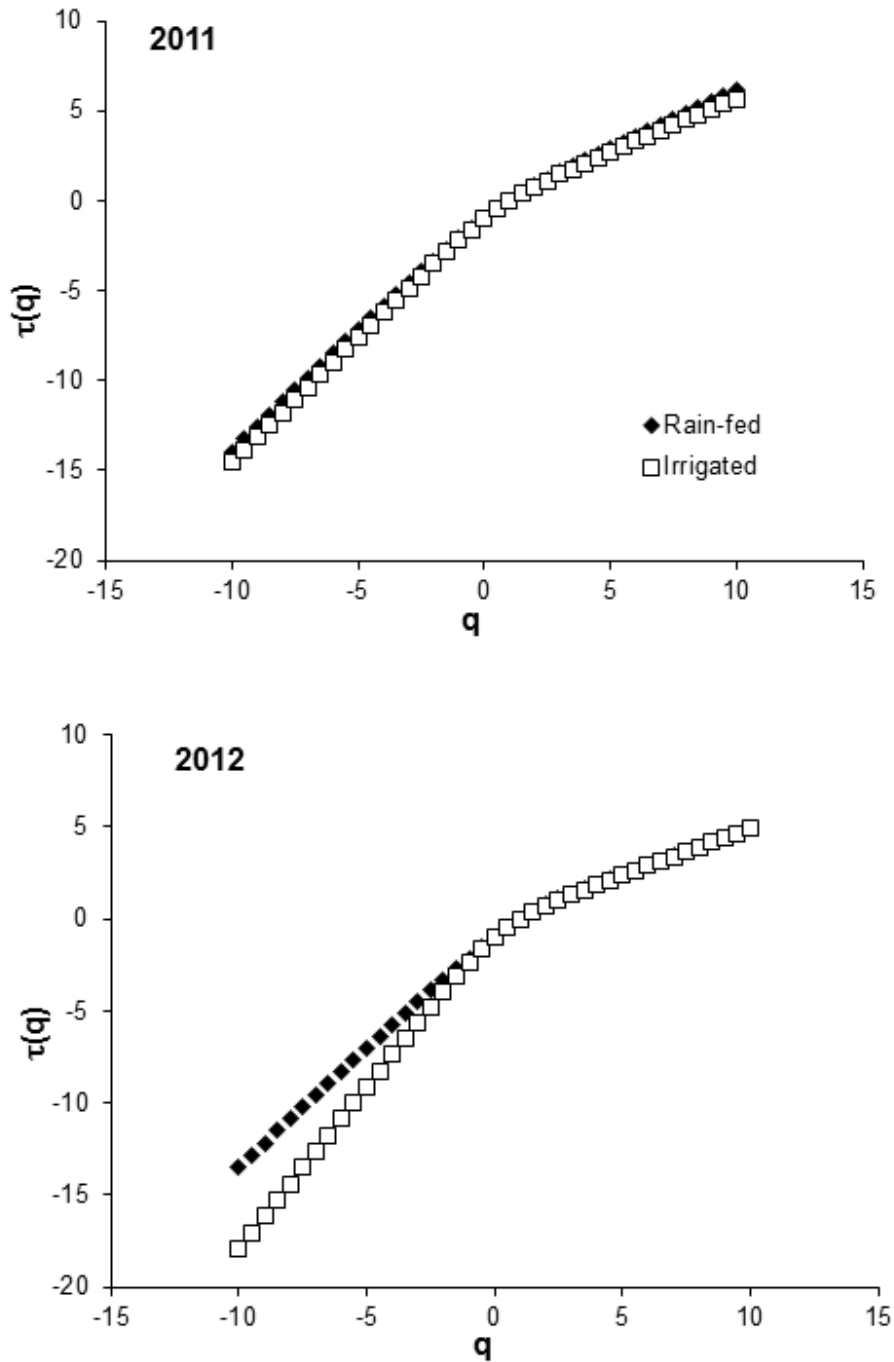

Supplement: Supplementary file 1 [file npg-23-205-2016-supplement.pdf]
